# Supplementary material for: Modeling Microbial Adaptations to Nutrient Limitation During Litter Decomposition
Source: Frontiers journal article supplement (doi:10.3389/ffgc.2021.686945), 2021-06-11
Supplement: Data_Sheet_1.XLSX [file Data_Sheet_1.XLSX]

## Sheet: local optimization
Study	Site	Litter type	Study (progressive number)	Litter type (progressive number by site)	Resouce use strategy (1 to 4 as in Fig. 1B-E)	Initial litter C:N ratio (-)	Initial lignin fraction (-)	Imax (gN/g initial C/y)	VH (1/y)	VO (1/y)	emax (-)	RMSE all dataset (-)	Fraction of explained variance (R2)	Starting from second point (1 yes/0 no)	Initial N limitation (1 yes/0 no)	RMSE fraction of remaining C (-)	RMSE fraction of remaining N (-)	RMSE fraction of remaining lignin (-)
Berg and McClaugherty (1989)	Jädraås	Pinus sylvestris	1	1	1	131.579	0.223	0.00217191	0.95227	0.378675	0.213637	0.0678931	0.957282	1	1	0.0249348	0.0822148	0.0802957
Berg and McClaugherty (1989)	Jädraås	Pinus sylvestris	1	2	1	125	0.267	0.00217191	0.748948	0.620347	0.131091	0.0598998	0.917679	0	0	0.0353577	0.0809693	0.0543851
Berg and McClaugherty (1989)	Jädraås	Pinus sylvestris	1	3	1	113.636	0.256	0.00217191	0.92168	0.578314	0.117482	0.0672333	0.903472	0	0	0.0443075	0.0910539	0.0575062
Berg and McClaugherty (1989)	Jädraås	Pinus sylvestris	1	4	1	113.636	0.251	0.00217191	0.918172	0.482836	0.125524	0.0526122	0.942599	0	0	0.0364572	0.0737093	0.0392674
Berg and McClaugherty (1989)	Jädraås	Pinus sylvestris	1	5	1	71.4286	0.269	0.00217191	1.18532	0.518443	0.060921	0.0576495	0.919701	0	0	0.0242563	0.0829726	0.0499758
Berg and McClaugherty (1989)	Jädraås	Pinus sylvestris	1	6	1	61.7284	0.268	0.00217191	1.33736	0.450166	0.0596629	0.0508365	0.938784	0	0	0.0298008	0.0590277	0.0581438
Berg and McClaugherty (1989)	Jädraås	Pinus sylvestris	1	7	1	104.167	0.231	0.00217191	0.745867	0.608217	0.115911	0.0755325	0.886286	0	0	0.0242487	0.101539	0.0788495
Berg and McClaugherty (1989)	Jädraås	Pinus sylvestris (green)	1	8	1	33.1126	0.22	0.00217191	0.98001	0.338988	0.144691	0.0567849	0.940091	0	0	0.0334947	0.0391037	0.0838008
Berg and McClaugherty (1989)	Jädraås	Pinus contorta	1	9	1	128.205	0.208	0.00217191	0.73	0.164498	0.149807	0.106523	0.863437	0	0	0.0335512	0.0854962	0.16002
Berg and McClaugherty (1989)	Jädraås	Pinus contorta (green)	1	10	1	47.619	0.346	0.00217191	1.14781	0.528333	0.530376	0.0517028	0.960685	0	1	0.0197865	0.0788421	0.037576
Berg and McClaugherty (1989)	Jädraås	Alnus incana	1	11	1	16.2866	0.264	0.00217191	0.73	0.287548	0.05	0.0577213	0.571857	0	0	0.0389214	0.0607406	0.0692165
Berg and McClaugherty (1989)	Jädraås	Betula pubescens	1	12	1	64.9351	0.33	0.00217191	0.946339	0.312022	0.756754	0.0601205	0.859759	0	1	0.0647472	0.05291	0.0620625
Berg and McClaugherty (1989)	Jädraås	Betula pubescens (green)	1	13	1	28.7356	0.322	0.00217191	0.770833	0.483616	0.8	0.054365	0.866667	0	0	0.0375101	0.0700626	0.0505061
Berg and McClaugherty (1989)	Jädraås	Betula pubescens	1	14	1	49.1045	0.460486	0.00217191	1.24766	0.372802	0.795973	0.072932	0.893553	1	1	0.0376734	0.11461	0.0374484
Berg and McClaugherty (1989)	Jädraås	Pinus sylvestris	1	1	2	131.579	0.223	0.00217191	1.02611	0.374873	0.201792	0.0670347	0.958355	1	0	0.0313728	0.114391	0.0412094
Berg and McClaugherty (1989)	Jädraås	Pinus sylvestris	1	2	2	125	0.267	0.00217191	0.748945	0.62035	0.131091	0.0598998	0.917679	0	1	0.0817869	0.107597	0.317402
Berg and McClaugherty (1989)	Jädraås	Pinus sylvestris	1	3	2	113.636	0.256	0.00217191	0.921681	0.578313	0.117482	0.0672332	0.903472	0	0	0.0489894	0.0859609	0.0663186
Berg and McClaugherty (1989)	Jädraås	Pinus sylvestris	1	4	2	113.636	0.251	0.00217191	0.918168	0.48284	0.125525	0.0526121	0.942599	0	1	0.0741201	0.0788652	0.399576
Berg and McClaugherty (1989)	Jädraås	Pinus sylvestris	1	5	2	71.4286	0.269	0.00217191	1.18532	0.518443	0.060921	0.0576495	0.919701	0	1	0.0419582	0.0764853	0.0604697
Berg and McClaugherty (1989)	Jädraås	Pinus sylvestris	1	6	2	61.7284	0.268	0.00217191	1.33736	0.450166	0.0596628	0.0508365	0.938784	0	0	0.0712927	0.0930881	0.0795991
Berg and McClaugherty (1989)	Jädraås	Pinus sylvestris	1	7	2	104.167	0.231	0.00217191	0.745866	0.608219	0.115911	0.0755325	0.886286	0	0	0.0647932	0.102977	0.0811695
Berg and McClaugherty (1989)	Jädraås	Pinus sylvestris (green)	1	8	2	33.1126	0.22	0.00217191	0.98001	0.338991	0.144691	0.0567849	0.940091	0	1	0.057287	0.0941782	0.0463996
Berg and McClaugherty (1989)	Jädraås	Pinus contorta	1	9	2	128.205	0.208	0.00217191	0.73	0.164499	0.149807	0.106523	0.863437	0	1	0.0423385	0.121295	0.0494822
Berg and McClaugherty (1989)	Jädraås	Pinus contorta (green)	1	10	2	47.619	0.346	0.00217191	1.4221	0.553464	0.43504	0.0514704	0.961038	0	0	0.0430076	0.0845629	0.0492786
Berg and McClaugherty (1989)	Jädraås	Alnus incana	1	11	2	16.2866	0.264	0.00217191	0.73	0.188262	0.8	0.054985	0.611487	0	0	0.049338	0.0656706	0.0696624
Berg and McClaugherty (1989)	Jädraås	Betula pubescens	1	12	2	64.9351	0.33	0.00217191	0.848517	0.331915	0.724903	0.0605058	0.857955	0	1	0.0355546	0.0750712	0.0599891
Berg and McClaugherty (1989)	Jädraås	Betula pubescens (green)	1	13	2	28.7356	0.322	0.00217191	0.770831	0.483617	0.8	0.0543649	0.866667	0	1	0.02754	0.0810482	0.0784454
Berg and McClaugherty (1989)	Jädraås	Betula pubescens	1	14	2	49.1045	0.460486	0.00217191	1.49172	0.376309	0.705223	0.071084	0.898879	1	0	0.0353582	0.0809691	0.0543852
Berg and McClaugherty (1989)	Jädraås	Pinus sylvestris	1	1	3	131.579	0.223	0.00217191	0.965576	0.380461	0.216056	0.0678886	0.957288	1	0	0.0443074	0.0910539	0.0575062
Berg and McClaugherty (1989)	Jädraås	Pinus sylvestris	1	2	3	125	0.267	0.00217191	0.752058	0.622564	0.131017	0.0598246	0.917885	0	0	0.0364576	0.0737091	0.0392673
Berg and McClaugherty (1989)	Jädraås	Pinus sylvestris	1	3	3	113.636	0.256	0.00217191	0.924732	0.580903	0.117428	0.0670755	0.903925	0	0	0.0242563	0.0829726	0.0499758
Berg and McClaugherty (1989)	Jädraås	Pinus sylvestris	1	4	3	113.636	0.251	0.00217191	0.921277	0.485073	0.125456	0.0524805	0.942886	0	0	0.0298008	0.0590276	0.0581438
Berg and McClaugherty (1989)	Jädraås	Pinus sylvestris	1	5	3	71.4286	0.269	0.00217191	1.18783	0.52136	0.0609614	0.0575644	0.919938	0	0	0.0242492	0.101539	0.0788496
Berg and McClaugherty (1989)	Jädraås	Pinus sylvestris	1	6	3	61.7284	0.268	0.00217191	1.33908	0.453128	0.05976	0.0507083	0.939092	0	0	0.0334945	0.0391038	0.083801
Berg and McClaugherty (1989)	Jädraås	Pinus sylvestris	1	7	3	104.167	0.231	0.00217191	0.748643	0.610464	0.115833	0.0754951	0.886399	0	0	0.0335515	0.0854962	0.16002
Berg and McClaugherty (1989)	Jädraås	Pinus sylvestris (green)	1	8	3	33.1126	0.22	0.00217191	10.95	0.778071	0.739932	0.0492987	0.954846	0	1	0.0370869	0.0705685	0.0399032
Berg and McClaugherty (1989)	Jädraås	Pinus contorta	1	9	3	128.205	0.208	0.00217191	10.95	0.301646	0.628698	0.123336	0.816929	0	0	0.0599677	0.0404458	0.0619521
Berg and McClaugherty (1989)	Jädraås	Pinus contorta (green)	1	10	3	47.619	0.346	0.00217191	1.54679	0.543429	0.620644	0.0507905	0.96206	0	0	0.0662974	0.0532363	0.0612651
Berg and McClaugherty (1989)	Jädraås	Alnus incana	1	11	3	16.2866	0.264	0.00217191	0.73	0.290182	0.05	0.0576052	0.573578	0	0	0.03751	0.0700627	0.0505061
Berg and McClaugherty (1989)	Jädraås	Betula pubescens	1	12	3	64.9351	0.33	0.00217191	0.940197	0.315999	0.747244	0.0601624	0.859563	0	1	0.0419987	0.109466	0.0375781
Berg and McClaugherty (1989)	Jädraås	Betula pubescens (green)	1	13	3	28.7356	0.322	0.00217191	0.775208	0.486041	0.8	0.0543415	0.866782	0	0	0.0313724	0.114391	0.0412094
Berg and McClaugherty (1989)	Jädraås	Betula pubescens	1	14	3	49.1045	0.460486	0.00217191	1.35466	0.371079	0.8	0.0724345	0.895	1	0	0.0827649	0.107556	0.31752
Berg and McClaugherty (1989)	Jädraås	Pinus sylvestris	1	1	4	131.579	0.223	0.00217191	0.951267	0.376596	0.203746	0.0684373	0.956595	1	0	0.0489893	0.0859609	0.0663186
Berg and McClaugherty (1989)	Jädraås	Pinus sylvestris	1	2	4	125	0.267	0.00217191	0.748936	0.620344	0.131091	0.0599	0.917678	0	1	0.060696	0.0930783	0.386733
Berg and McClaugherty (1989)	Jädraås	Pinus sylvestris	1	3	4	113.636	0.256	0.00217191	0.921665	0.578317	0.117483	0.0672337	0.903471	0	1	0.0525085	0.0753334	0.0635643
Berg and McClaugherty (1989)	Jädraås	Pinus sylvestris	1	4	4	113.636	0.251	0.00217191	0.918161	0.482833	0.125525	0.0526125	0.942598	0	0	0.0712927	0.093088	0.0795991
Berg and McClaugherty (1989)	Jädraås	Pinus sylvestris	1	5	4	71.4286	0.269	0.00217191	1.18533	0.518426	0.06092	0.0576498	0.919701	0	0	0.0647896	0.102979	0.0811706
Berg and McClaugherty (1989)	Jädraås	Pinus sylvestris	1	6	4	61.7284	0.268	0.00217191	1.33736	0.450155	0.0596622	0.0508369	0.938783	0	1	0.0689486	0.0923476	0.0445548
Berg and McClaugherty (1989)	Jädraås	Pinus sylvestris	1	7	4	104.167	0.231	0.00217191	0.745859	0.608212	0.115911	0.0755326	0.886286	0	1	0.0428941	0.116942	0.0525883
Berg and McClaugherty (1989)	Jädraås	Pinus sylvestris (green)	1	8	4	33.1126	0.22	0.00217191	0.980003	0.338985	0.144691	0.0567849	0.940091	0	0	0.0430076	0.0845628	0.0492786
Berg and McClaugherty (1989)	Jädraås	Pinus contorta	1	9	4	128.205	0.208	0.00217191	0.73	0.164495	0.149807	0.106523	0.863437	0	0	0.049338	0.0656707	0.0696623
Berg and McClaugherty (1989)	Jädraås	Pinus contorta (green)	1	10	4	47.619	0.346	0.00217191	1.36936	0.521369	0.450662	0.0504746	0.962531	0	1	0.0338652	0.0760653	0.0603415
Berg and McClaugherty (1989)	Jädraås	Alnus incana	1	11	4	16.2866	0.264	0.00217191	0.73	0.287541	0.05	0.0577216	0.571853	0	1	0.0253815	0.0821655	0.0801948
Berg and McClaugherty (1989)	Jädraås	Betula pubescens	1	12	4	64.9351	0.33	0.00217191	0.932554	0.312704	0.737195	0.0600382	0.860142	0	0	0.035217	0.0808601	0.0543908
Berg and McClaugherty (1989)	Jädraås	Betula pubescens (green)	1	13	4	28.7356	0.322	0.00217191	0.770819	0.48361	0.8	0.054365	0.866666	0	0	0.0441432	0.0908467	0.0574074
Berg and McClaugherty (1989)	Jädraås	Betula pubescens	1	14	4	49.1045	0.460486	0.00217191	1.35993	0.36822	0.719985	0.0719694	0.896344	1	0	0.0362959	0.0735182	0.0392464
Berg and McClaugherty (1989)	Stråsan	Picea abies	1	1	1	119.048	0.341	0.00309121	0.73	0.385896	0.331708	0.0724977	0.836621	1	0	0.0241958	0.0828769	0.0498695
Berg and McClaugherty (1989)	Stråsan	Picea abies (green)	1	2	1	58.8235	0.208	0.00309121	1.14123	0.073	0.176141	0.199174	0.520538	0	0	0.029726	0.0589177	0.0579576
Berg and McClaugherty (1989)	Stråsan	Picea abies	1	3	1	119.048	0.34	0.00309121	0.777893	0.135931	0.299184	0.0687687	0.893057	0	0	0.0241183	0.101455	0.0788911
Berg and McClaugherty (1989)	Stråsan	Picea abies (green)	1	4	1	58.8235	0.208	0.00309121	1.01751	0.073	0.303105	0.239008	0.368459	0	1	0.0337853	0.0461422	0.0634077
Berg and McClaugherty (1989)	Stråsan	Picea abies	1	1	2	119.048	0.341	0.00309121	0.73	0.385899	0.331708	0.0724977	0.836622	1	1	0.140753	0.117301	0.109837
Berg and McClaugherty (1989)	Stråsan	Picea abies (green)	1	2	2	58.8235	0.208	0.00309121	1.10967	0.073	0.166964	0.199363	0.519623	0	1	0.0225587	0.0752924	0.0395116
Berg and McClaugherty (1989)	Stråsan	Picea abies	1	3	2	119.048	0.34	0.00309121	0.777897	0.135931	0.299184	0.0687687	0.893057	0	0	0.0385818	0.0608293	0.0690384
Berg and McClaugherty (1989)	Stråsan	Picea abies (green)	1	4	2	58.8235	0.208	0.00309121	10.95	0.073	0.342981	0.232314	0.403338	0	1	0.0653183	0.0528776	0.0616119
Berg and McClaugherty (1989)	Stråsan	Picea abies	1	1	3	119.048	0.341	0.00309121	0.73	0.389022	0.331909	0.0724181	0.83698	1	0	0.0375045	0.07005	0.0504522
Berg and McClaugherty (1989)	Stråsan	Picea abies (green)	1	2	3	58.8235	0.208	0.00309121	10.95	0.131071	0.656132	0.16541	0.669316	0	1	0.0387078	0.113222	0.0377195
Berg and McClaugherty (1989)	Stråsan	Picea abies	1	3	3	119.048	0.34	0.00309121	0.781304	0.136288	0.299038	0.0687625	0.893076	0	0	0.0309864	0.114362	0.0411635
Berg and McClaugherty (1989)	Stråsan	Picea abies (green)	1	4	3	58.8235	0.208	0.00309121	10.95	0.073	0.8	0.167698	0.689093	0	1	0.0528106	0.119756	0.254854
Berg and McClaugherty (1989)	Stråsan	Picea abies	1	1	4	119.048	0.341	0.00309121	0.73	0.385891	0.331707	0.0724979	0.836621	1	0	0.0489318	0.0859684	0.0663321
Berg and McClaugherty (1989)	Stråsan	Picea abies (green)	1	2	4	58.8235	0.208	0.00309121	1.08395	0.073	0.164365	0.199409	0.519404	0	1	0.0337001	0.0898315	0.274157
Berg and McClaugherty (1989)	Stråsan	Picea abies	1	3	4	119.048	0.34	0.00309121	0.777887	0.13593	0.299184	0.0687687	0.893057	0	1	0.0409515	0.076379	0.0581708
Berg and McClaugherty (1989)	Stråsan	Picea abies (green)	1	4	4	58.8235	0.208	0.00309121	0.860188	0.073	0.202702	0.242033	0.352373	0	0	0.0710872	0.0930139	0.0795009
Berg and McClaugherty (1989)	Malung	Pinus sylvestris	1	1	1	121.951	0.285	0.000823986	1.23404	1.15422	0.211154	0.0612837	0.946621	0	0	0.0644846	0.102798	0.0810478
Berg and McClaugherty (1989)	Malung	Pinus sylvestris	1	2	1	138.889	0.293	0.000823986	0.823041	1.93515	0.135487	0.0818211	0.885503	0	1	0.0556117	0.0945035	0.0456528
Berg and McClaugherty (1989)	Malung	Pinus sylvestris	1	3	1	113.636	0.265	0.000823986	1.08053	0.758881	0.104376	0.0844412	0.862412	0	1	0.0430245	0.120847	0.0487692
Berg and McClaugherty (1989)	Malung	Pinus sylvestris	1	4	1	108.696	0.3	0.000823986	1.329	1.23146	0.211217	0.0690513	0.911949	1	0	0.0431247	0.084276	0.0491658
Berg and McClaugherty (1989)	Malung	Pinus contorta	1	5	1	147.059	0.389	0.000823986	1.11062	1.31341	0.257382	0.0794849	0.932485	0	0	0.0492177	0.065648	0.0695895
Berg and McClaugherty (1989)	Malung	Pinus contorta	1	6	1	131.579	0.391	0.000823986	0.73	1.70881	0.215127	0.0617222	0.942706	0	1	0.0356272	0.0750006	0.0602596
Berg and McClaugherty (1989)	Malung	Pinus contorta	1	7	1	125	0.366	0.000823986	0.955874	1.55805	0.209664	0.0621818	0.948802	1	1	0.0247867	0.0819019	0.0820286
Berg and McClaugherty (1989)	Malung	Pinus contorta	1	8	1	135.135	0.357	0.000823986	1.02739	1.09663	0.222613	0.0591566	0.947616	0	0	0.035359	0.0809693	0.0543851
Berg and McClaugherty (1989)	Malung	Pinus sylvestris	1	1	2	121.951	0.285	0.000823986	1.25155	1.2909	0.177621	0.0644792	0.940909	0	0	0.0443088	0.0910542	0.0575062
Berg and McClaugherty (1989)	Malung	Pinus sylvestris	1	2	2	138.889	0.293	0.000823986	0.823041	1.93515	0.135487	0.081821	0.885503	0	0	0.0364579	0.0737097	0.0392674
Berg and McClaugherty (1989)	Malung	Pinus sylvestris	1	3	2	113.636	0.265	0.000823986	1.08057	0.758831	0.104376	0.0844412	0.862412	0	0	0.024256	0.0829727	0.0499766
Berg and McClaugherty (1989)	Malung	Pinus sylvestris	1	4	2	108.696	0.3	0.000823986	1.08029	1.53224	0.177852	0.0713375	0.906022	1	0	0.0298009	0.0590278	0.0581445
Berg and McClaugherty (1989)	Malung	Pinus contorta	1	5	2	147.059	0.389	0.000823986	1.27226	1.30146	0.248044	0.0780619	0.934881	0	0	0.0242494	0.101539	0.0788495
Berg and McClaugherty (1989)	Malung	Pinus contorta	1	6	2	131.579	0.391	0.000823986	0.73	1.70882	0.215127	0.0617222	0.942706	0	0	0.0334949	0.0391036	0.0838007
Berg and McClaugherty (1989)	Malung	Pinus contorta	1	7	2	125	0.366	0.000823986	0.955871	1.55805	0.209664	0.0621818	0.948802	1	0	0.0335511	0.0854966	0.160019
Berg and McClaugherty (1989)	Malung	Pinus contorta	1	8	2	135.135	0.357	0.000823986	1.06343	1.1204	0.211862	0.0593686	0.94724	0	1	0.0300238	0.0721513	0.0391895
Berg and McClaugherty (1989)	Malung	Pinus sylvestris	1	1	3	121.951	0.285	0.000823986	1.29784	1.10606	0.223522	0.0602622	0.948386	0	0	0.0389223	0.0607404	0.069217
Berg and McClaugherty (1989)	Malung	Pinus sylvestris	1	2	3	138.889	0.293	0.000823986	0.826219	1.93774	0.135427	0.0817014	0.885838	0	1	0.0653695	0.0528505	0.0612162
Berg and McClaugherty (1989)	Malung	Pinus sylvestris	1	3	3	113.636	0.265	0.000823986	1.08565	0.760446	0.104313	0.0842506	0.863033	0	0	0.0375101	0.0700627	0.0505062
Berg and McClaugherty (1989)	Malung	Pinus sylvestris	1	4	3	108.696	0.3	0.000823986	1.38097	1.17211	0.219129	0.0685754	0.913159	1	1	0.041256	0.11133	0.037978
Berg and McClaugherty (1989)	Malung	Pinus contorta	1	5	3	147.059	0.389	0.000823986	1.13559	1.27049	0.262606	0.0792327	0.932913	0	0	0.0313734	0.114391	0.0412095
Berg and McClaugherty (1989)	Malung	Pinus contorta	1	6	3	131.579	0.391	0.000823986	0.73	1.71837	0.214899	0.0615886	0.942954	0	0	0.0817001	0.107839	0.317785
Berg and McClaugherty (1989)	Malung	Pinus contorta	1	7	3	125	0.366	0.000823986	0.959705	1.56021	0.209625	0.0621148	0.948913	1	0	0.0489895	0.0859609	0.0663186
Berg and McClaugherty (1989)	Malung	Pinus contorta	1	8	3	135.135	0.357	0.000823986	1.02206	1.08869	0.221895	0.0592329	0.947481	0	1	0.080454	0.0876433	0.401977
Berg and McClaugherty (1989)	Malung	Pinus sylvestris	1	1	4	121.951	0.285	0.000823986	1.19044	1.21594	0.182771	0.0619609	0.945435	0	1	0.0469953	0.0760047	0.0594322
Berg and McClaugherty (1989)	Malung	Pinus sylvestris	1	2	4	138.889	0.293	0.000823986	0.823032	1.93515	0.135487	0.0818214	0.885502	0	0	0.0712933	0.0930882	0.0795994
Berg and McClaugherty (1989)	Malung	Pinus sylvestris	1	3	4	113.636	0.265	0.000823986	1.08057	0.758816	0.104376	0.0844417	0.86241	0	0	0.0647896	0.102979	0.0811712
Berg and McClaugherty (1989)	Malung	Pinus sylvestris	1	4	4	108.696	0.3	0.000823986	1.20724	1.33765	0.189725	0.0693672	0.911142	1	1	0.0615426	0.0932313	0.0442251
Berg and McClaugherty (1989)	Malung	Pinus contorta	1	5	4	147.059	0.389	0.000823986	1.16221	1.25179	0.252477	0.078786	0.933667	0	1	0.043848	0.119204	0.0498941
Berg and McClaugherty (1989)	Malung	Pinus contorta	1	6	4	131.579	0.391	0.000823986	0.73	1.70879	0.215128	0.0617226	0.942705	0	0	0.0430073	0.0845636	0.0492789
Berg and McClaugherty (1989)	Malung	Pinus contorta	1	7	4	125	0.366	0.000823986	0.95586	1.55805	0.209664	0.0621819	0.948802	0	0	0.0493383	0.0656707	0.0696625
Berg and McClaugherty (1989)	Malung	Pinus contorta	1	8	4	135.135	0.357	0.000823986	1.02773	1.07741	0.21671	0.0594477	0.9471	0	1	0.0353237	0.0754607	0.0604981
Hirobe et al. (2004)	Kuching	Shorea slooteni	4	1	1	63.0089	0.763274	0.00535487	3.24099	2.64098	0.156559	0.0605	0.932103	0	0	0.0482062	0.0653542	0.0725007
Hirobe et al. (2004)	Kuching	Mesua borneensis	4	2	1	67.325	0.778169	0.00535487	5.4377	8.85901	0.0534702	0.0887958	0.925172	0	0	0.0646237	0.108946	0.0853078
Hirobe et al. (2004)	Kuching	Shorea beccariana	4	3	1	65.6729	0.928087	0.00535487	3.77418	1.80419	0.353827	0.0417748	0.959089	0	0	0.0284084	0.0504188	0.0453401
Hirobe et al. (2004)	Kuching	Shorea pubistyla	4	4	1	58.4211	0.841849	0.00535487	3.66357	1.30749	0.325886	0.0494331	0.927153	0	0	0.0519953	0.0548118	0.0252654
Hirobe et al. (2004)	Kuching	Dipterocarpus geniculatus	4	5	1	72.6973	1.03351	0.00535487	3.11075	0.820998	0.703098	0.0526555	0.899276	0	0	0.0446267	0.0655419	0.0337645
Hirobe et al. (2004)	Kuching	Anisoptera grossivenia	4	6	1	59.9941	0.861331	0.00535487	2.27871	1.98658	0.348421	0.0432879	0.941511	0	0	0.0341693	0.0402528	0.063131
Hirobe et al. (2004)	Kuching	Ficus brunneo-aurata	4	7	1	39.9823	0.605085	0.00535487	5.13587	3.65649	0.15296	0.0842458	0.899642	0	0	0.0646728	0.100609	0.082797
Hirobe et al. (2004)	Kuching	Pouteria malaccensis	4	8	1	40.6029	0.814443	0.00535487	2.50491	1.63177	0.296522	0.0458734	0.933325	0	0	0.0316637	0.0478745	0.0641525
Hirobe et al. (2004)	Kuching	Dyera costulata	4	9	1	52.7147	0.813989	0.00535487	4.14452	2.99441	0.222576	0.0662065	0.936506	0	0	0.0499637	0.0842904	0.0504689
Hirobe et al. (2004)	Kuching	Artocarpus anisophyllus	4	10	1	51.1997	0.811851	0.00535487	3.35629	3.17501	0.2428	0.0600366	0.928399	0	0	0.0416944	0.0740737	0.0597325
Hirobe et al. (2004)	Kuching	Macaranga gigantea	4	11	1	46.0442	0.908248	0.00535487	6.49097	1.40143	0.451344	0.0612746	0.924019	0	1	0.0393011	0.0828876	0.0419748
Hirobe et al. (2004)	Kuching	Dillenia suffruticosa	4	12	1	55.1697	0.797474	0.00535487	3.98821	2.34091	0.37262	0.0763382	0.902568	0	0	0.0388561	0.104639	0.063706
Hirobe et al. (2004)	Kuching	Artocarpus elasticus	4	13	1	56.1837	0.756552	0.00535487	4.05871	2.43457	0.25872	0.0850837	0.895716	0	0	0.0534747	0.1132	0.0678951
Hirobe et al. (2004)	Kuching	Macaranga kingii	4	14	1	52.6471	0.584122	0.00535487	10.6744	1.85646	0.05	0.0742561	0.89484	0	0	0.056635	0.0786258	0.0954904
Hirobe et al. (2004)	Kuching	Macaranga hypoleuca	4	15	1	64.1371	0.83633	0.00535487	3.75632	2.31401	0.240633	0.0448096	0.943419	0	0	0.0375889	0.0492259	0.0490225
Hirobe et al. (2004)	Kuching	Shorea slooteni	4	1	2	63.0089	0.763274	0.00535487	3.24097	2.64101	0.156559	0.0605	0.932103	0	0	0.048206	0.0653543	0.0725008
Hirobe et al. (2004)	Kuching	Mesua borneensis	4	2	2	67.325	0.778169	0.00535487	5.43767	8.85909	0.0534701	0.0887958	0.925172	0	0	0.0646237	0.108946	0.0853076
Hirobe et al. (2004)	Kuching	Shorea beccariana	4	3	2	65.6729	0.928087	0.00535487	3.77417	1.80419	0.353827	0.0417748	0.959089	0	0	0.0284083	0.050419	0.0453398
Hirobe et al. (2004)	Kuching	Shorea pubistyla	4	4	2	58.4211	0.841849	0.00535487	3.66357	1.30749	0.325886	0.0494331	0.927153	0	0	0.0519953	0.0548118	0.0252654
Hirobe et al. (2004)	Kuching	Dipterocarpus geniculatus	4	5	2	72.6973	1.03351	0.00535487	3.11074	0.821003	0.703097	0.0526555	0.899276	0	0	0.0446266	0.065542	0.0337644
Hirobe et al. (2004)	Kuching	Anisoptera grossivenia	4	6	2	59.9941	0.861331	0.00535487	2.27873	1.98654	0.348419	0.0432879	0.941511	0	0	0.0341694	0.0402526	0.0631312
Hirobe et al. (2004)	Kuching	Ficus brunneo-aurata	4	7	2	39.9823	0.605085	0.00535487	5.13587	3.6565	0.15296	0.0842458	0.899642	0	0	0.0646729	0.100609	0.082797
Hirobe et al. (2004)	Kuching	Pouteria malaccensis	4	8	2	40.6029	0.814443	0.00535487	2.50491	1.63177	0.296521	0.0458734	0.933325	0	0	0.0316637	0.0478745	0.0641525
Hirobe et al. (2004)	Kuching	Dyera costulata	4	9	2	52.7147	0.813989	0.00535487	4.14452	2.99441	0.222576	0.0662065	0.936506	0	0	0.0499637	0.0842904	0.0504689
Hirobe et al. (2004)	Kuching	Artocarpus anisophyllus	4	10	2	51.1997	0.811851	0.00535487	3.3563	3.17501	0.242801	0.0600366	0.928399	0	0	0.0416944	0.0740737	0.0597325
Hirobe et al. (2004)	Kuching	Macaranga gigantea	4	11	2	46.0442	0.908248	0.00535487	6.57389	1.3978	0.447758	0.06124	0.924105	0	1	0.0398087	0.0825547	0.0420923
Hirobe et al. (2004)	Kuching	Dillenia suffruticosa	4	12	2	55.1697	0.797474	0.00535487	4.03183	2.32439	0.373173	0.0763201	0.902614	0	1	0.039287	0.104362	0.0640081
Hirobe et al. (2004)	Kuching	Artocarpus elasticus	4	13	2	56.1837	0.756552	0.00535487	4.05856	2.43468	0.258722	0.0850837	0.895716	0	0	0.0534728	0.113201	0.0678943
Hirobe et al. (2004)	Kuching	Macaranga kingii	4	14	2	52.6471	0.584122	0.00535487	10.6745	1.85645	0.05	0.0742561	0.89484	0	0	0.0566352	0.0786256	0.0954905
Hirobe et al. (2004)	Kuching	Macaranga hypoleuca	4	15	2	64.1371	0.83633	0.00535487	3.75634	2.314	0.240633	0.0448096	0.943419	0	0	0.0375887	0.0492261	0.0490225
Hirobe et al. (2004)	Kuching	Shorea slooteni	4	1	3	63.0089	0.763274	0.00535487	3.24386	2.64378	0.156536	0.0605178	0.932063	0	0	0.0482193	0.0653697	0.0725306
Hirobe et al. (2004)	Kuching	Mesua borneensis	4	2	3	67.325	0.778169	0.00535487	5.44088	8.86365	0.0534276	0.0888003	0.925164	0	0	0.0646275	0.108962	0.0852818
Hirobe et al. (2004)	Kuching	Shorea beccariana	4	3	3	65.6729	0.928087	0.00535487	3.77801	1.80622	0.353787	0.0417934	0.959053	0	0	0.0284194	0.0504442	0.0453555
Hirobe et al. (2004)	Kuching	Shorea pubistyla	4	4	3	58.4211	0.841849	0.00535487	3.66741	1.30928	0.32586	0.0494398	0.927133	0	0	0.0519975	0.0548202	0.0252865
Hirobe et al. (2004)	Kuching	Dipterocarpus geniculatus	4	5	3	72.6973	1.03351	0.00535487	3.11632	0.822348	0.703033	0.0526599	0.899259	0	0	0.0446307	0.0655439	0.0337814
Hirobe et al. (2004)	Kuching	Anisoptera grossivenia	4	6	3	59.9941	0.861331	0.00535487	2.28167	1.98903	0.348388	0.0432942	0.941494	0	0	0.0341797	0.040257	0.063136
Hirobe et al. (2004)	Kuching	Ficus brunneo-aurata	4	7	3	39.9823	0.605085	0.00535487	5.13843	3.66093	0.152927	0.0842607	0.899606	0	0	0.0646696	0.100638	0.0828059
Hirobe et al. (2004)	Kuching	Pouteria malaccensis	4	8	3	40.6029	0.814443	0.00535487	2.50804	1.63384	0.296486	0.0458879	0.933283	0	0	0.0316845	0.0478859	0.0641673
Hirobe et al. (2004)	Kuching	Dyera costulata	4	9	3	52.7147	0.813989	0.00535487	4.14773	2.99731	0.222536	0.066238	0.936446	0	0	0.0499933	0.0843319	0.0504749
Hirobe et al. (2004)	Kuching	Artocarpus anisophyllus	4	10	3	51.1997	0.811851	0.00535487	3.35944	3.17799	0.242766	0.0600473	0.928373	0	0	0.0417095	0.0740927	0.0597158
Hirobe et al. (2004)	Kuching	Macaranga gigantea	4	11	3	46.0442	0.908248	0.00535487	6.48347	1.404	0.450574	0.061303	0.923948	0	1	0.039247	0.0829892	0.0418686
Hirobe et al. (2004)	Kuching	Dillenia suffruticosa	4	12	3	55.1697	0.797474	0.00535487	3.99944	2.3398	0.372768	0.0763488	0.90254	0	0	0.0389614	0.104618	0.0637113
Hirobe et al. (2004)	Kuching	Artocarpus elasticus	4	13	3	56.1837	0.756552	0.00535487	4.06067	2.43833	0.258716	0.0851293	0.895604	0	0	0.0534938	0.113261	0.0679462
Hirobe et al. (2004)	Kuching	Macaranga kingii	4	14	3	52.6471	0.584122	0.00535487	10.6681	1.86099	0.05	0.0742443	0.894873	0	0	0.0566255	0.0786446	0.0954192
Hirobe et al. (2004)	Kuching	Macaranga hypoleuca	4	15	3	64.1371	0.83633	0.00535487	3.7599	2.31643	0.240605	0.0447835	0.943485	0	0	0.0375569	0.0492108	0.0489812
Hirobe et al. (2004)	Kuching	Shorea slooteni	4	1	4	63.0089	0.763274	0.00535487	3.24083	2.64116	0.156561	0.0605	0.932103	0	0	0.048205	0.0653547	0.0725011
Hirobe et al. (2004)	Kuching	Mesua borneensis	4	2	4	67.325	0.778169	0.00535487	5.43769	8.85901	0.0534703	0.0887958	0.925172	0	0	0.0646237	0.108946	0.0853078
Hirobe et al. (2004)	Kuching	Shorea beccariana	4	3	4	65.6729	0.928087	0.00535487	3.77423	1.80415	0.353827	0.0417748	0.95909	0	0	0.0284086	0.0504182	0.0453411
Hirobe et al. (2004)	Kuching	Shorea pubistyla	4	4	4	58.4211	0.841849	0.00535487	3.66356	1.30749	0.325886	0.049433	0.927153	0	0	0.0519953	0.0548118	0.0252653
Hirobe et al. (2004)	Kuching	Dipterocarpus geniculatus	4	5	4	72.6973	1.03351	0.00535487	3.11074	0.820998	0.703098	0.0526555	0.899276	0	0	0.0446266	0.0655419	0.0337644
Hirobe et al. (2004)	Kuching	Anisoptera grossivenia	4	6	4	59.9941	0.861331	0.00535487	2.27872	1.98654	0.34842	0.0432879	0.941511	0	0	0.0341694	0.0402526	0.0631312
Hirobe et al. (2004)	Kuching	Ficus brunneo-aurata	4	7	4	39.9823	0.605085	0.00535487	5.13579	3.65653	0.152959	0.0842457	0.899642	0	0	0.0646729	0.100609	0.0827969
Hirobe et al. (2004)	Kuching	Pouteria malaccensis	4	8	4	40.6029	0.814443	0.00535487	2.5049	1.63176	0.296522	0.0458733	0.933326	0	0	0.0316636	0.0478745	0.0641525
Hirobe et al. (2004)	Kuching	Dyera costulata	4	9	4	52.7147	0.813989	0.00535487	4.14491	2.99401	0.222571	0.0662064	0.936506	0	0	0.0499665	0.0842868	0.0504751
Hirobe et al. (2004)	Kuching	Artocarpus anisophyllus	4	10	4	51.1997	0.811851	0.00535487	3.35627	3.17502	0.242801	0.0600366	0.928399	0	0	0.0416944	0.0740738	0.0597323
Hirobe et al. (2004)	Kuching	Macaranga gigantea	4	11	4	46.0442	0.908248	0.00535487	6.52394	1.39948	0.4476	0.0612738	0.924021	0	1	0.0395561	0.0827657	0.0419703
Hirobe et al. (2004)	Kuching	Dillenia suffruticosa	4	12	4	55.1697	0.797474	0.00535487	3.99667	2.3363	0.372581	0.0763342	0.902578	0	0	0.038963	0.104581	0.0637467
Hirobe et al. (2004)	Kuching	Artocarpus elasticus	4	13	4	56.1837	0.756552	0.00535487	4.05856	2.43467	0.258722	0.0850836	0.895717	0	0	0.0534727	0.113201	0.0678941
Hirobe et al. (2004)	Kuching	Macaranga kingii	4	14	4	52.6471	0.584122	0.00535487	10.6745	1.85644	0.05	0.0742561	0.894839	0	0	0.0566352	0.0786256	0.0954907
Hirobe et al. (2004)	Kuching	Macaranga hypoleuca	4	15	4	64.1371	0.83633	0.00535487	3.75634	2.31398	0.240633	0.0448097	0.943419	0	0	0.0375887	0.0492262	0.0490226
Osono and Takeda (2004, 2005)	Kyoto (upper site)	Fagus crenata	2	1	1	51.178	0.436541	0.0135091	1.56122	0.355726	0.741275	0.0478443	0.961178	0	0	0.0313143	0.0678853	0.0357526
Osono and Takeda (2004, 2005)	Kyoto (upper site)	Quercus crispula	2	2	1	63.1097	0.390019	0.0135091	1.71846	0.97652	0.458352	0.0495488	0.96829	0	0	0.030832	0.0636436	0.0486224
Osono and Takeda (2004, 2005)	Kyoto (upper site)	Acer mono	2	3	1	61.8289	0.322804	0.0135091	1.56818	0.491146	0.43854	0.0718647	0.948798	0	0	0.0521599	0.100805	0.0511001
Osono and Takeda (2004, 2005)	Kyoto (upper site)	Acer rufinerve	2	4	1	86.3125	0.463534	0.0135091	2.10788	0.610265	0.8	0.0784084	0.965831	0	0	0.0476078	0.108355	0.0666059
Osono and Takeda (2004, 2005)	Kyoto (upper site)	Swida controversa	2	5	1	20.7953	0.299163	0.0135091	2.09593	7.60756	0.05	0.0847115	0.916057	1	0	0.0737311	0.0785275	0.0996256
Osono and Takeda (2004, 2005)	Kyoto (upper site)	Betula grossa	2	6	1	40.3815	0.416194	0.0135091	1.7668	0.673585	0.588449	0.0392314	0.968589	0	0	0.0343609	0.0425728	0.0403012
Osono and Takeda (2004, 2005)	Kyoto (upper site)	Mallotus japonicus	2	7	1	22.9719	0.252116	0.0135091	1.56846	8.48763	0.05	0.100901	0.845435	1	0	0.101356	0.0808254	0.117206
Osono and Takeda (2004, 2005)	Kyoto (upper site)	Pterostyrax hispida	2	8	1	13.71	0.414909	0.0135091	1.56341	2.13293	0.05	0.0565472	0.935489	1	0	0.0672221	0.0427087	0.0570079
Osono and Takeda (2004, 2005)	Kyoto (upper site)	Castanea crenata	2	9	1	47.5468	0.322646	0.0135091	1.89239	1.44876	0.366022	0.0658132	0.935559	0	0	0.0591615	0.0512048	0.0828983
Osono and Takeda (2004, 2005)	Kyoto (upper site)	Carpinus laxiflora	2	10	1	26.4674	0.314844	0.0135091	1.5482	1.62953	0.252389	0.0659862	0.913512	1	0	0.0607401	0.0725882	0.0640635
Osono and Takeda (2004, 2005)	Kyoto (upper site)	Magnolia obovata	2	11	1	56.5629	0.289926	0.0135091	2.47523	0.698644	0.411587	0.0956671	0.921916	0	1	0.0694439	0.145151	0.0395643
Osono and Takeda (2004, 2005)	Kyoto (upper site)	Pterocarya rhoifolia	2	12	1	29.8006	0.461924	0.0135091	2.33187	0.305625	0.8	0.0415163	0.948148	0	0	0.0400358	0.0336233	0.0493702
Osono and Takeda (2004, 2005)	Kyoto (upper site)	Aesculus turbinata	2	13	1	46.3902	0.501394	0.0135091	2.32151	0.0759002	0.8	0.12974	0.704158	0	0	0.0320386	0.194066	0.108673
Osono and Takeda (2004, 2005)	Kyoto (upper site)	Cryptomeria japonica	2	14	1	94.7757	0.342083	0.0135091	1.19007	0.273332	0.373005	0.0584378	0.960893	0	0	0.0293088	0.0537944	0.0805734
Osono and Takeda (2004, 2005)	Kyoto (upper site)	Fagus crenata	2	1	2	51.178	0.436541	0.0135091	1.56123	0.355729	0.741274	0.0478444	0.961178	0	0	0.0313144	0.0678854	0.0357526
Osono and Takeda (2004, 2005)	Kyoto (upper site)	Quercus crispula	2	2	2	63.1097	0.390019	0.0135091	1.71847	0.97652	0.458352	0.0495489	0.96829	0	0	0.0308321	0.0636436	0.0486225
Osono and Takeda (2004, 2005)	Kyoto (upper site)	Acer mono	2	3	2	61.8289	0.322804	0.0135091	1.56819	0.491149	0.438539	0.0718646	0.948798	0	0	0.0521595	0.100805	0.0511002
Osono and Takeda (2004, 2005)	Kyoto (upper site)	Acer rufinerve	2	4	2	86.3125	0.463534	0.0135091	2.10789	0.610267	0.8	0.0784083	0.965832	0	0	0.0476078	0.108355	0.0666059
Osono and Takeda (2004, 2005)	Kyoto (upper site)	Swida controversa	2	5	2	20.7953	0.299163	0.0135091	2.09592	7.60761	0.05	0.0847115	0.916057	1	0	0.0737313	0.0785272	0.0996257
Osono and Takeda (2004, 2005)	Kyoto (upper site)	Betula grossa	2	6	2	40.3815	0.416194	0.0135091	1.76681	0.673587	0.588449	0.0392314	0.968589	0	0	0.0343609	0.0425729	0.0403012
Osono and Takeda (2004, 2005)	Kyoto (upper site)	Mallotus japonicus	2	7	2	22.9719	0.252116	0.0135091	1.56847	8.48747	0.05	0.100901	0.845435	1	0	0.101356	0.0808263	0.117206
Osono and Takeda (2004, 2005)	Kyoto (upper site)	Pterostyrax hispida	2	8	2	13.71	0.414909	0.0135091	1.56341	2.13293	0.05	0.0565472	0.935489	1	0	0.0672221	0.0427087	0.0570079
Osono and Takeda (2004, 2005)	Kyoto (upper site)	Castanea crenata	2	9	2	47.5468	0.322646	0.0135091	1.89238	1.44878	0.366022	0.0658132	0.935559	0	0	0.0591617	0.051205	0.0828981
Osono and Takeda (2004, 2005)	Kyoto (upper site)	Carpinus laxiflora	2	10	2	26.4674	0.314844	0.0135091	1.5482	1.62953	0.252389	0.0659862	0.913512	1	0	0.0607401	0.0725882	0.0640635
Osono and Takeda (2004, 2005)	Kyoto (upper site)	Magnolia obovata	2	11	2	56.5629	0.289926	0.0135091	2.96907	0.667596	0.38697	0.0922789	0.927349	0	1	0.076687	0.134514	0.0396393
Osono and Takeda (2004, 2005)	Kyoto (upper site)	Pterocarya rhoifolia	2	12	2	29.8006	0.461924	0.0135091	2.33188	0.305628	0.8	0.0415161	0.948148	0	0	0.0400356	0.0336232	0.0493699
Osono and Takeda (2004, 2005)	Kyoto (upper site)	Aesculus turbinata	2	13	2	46.3902	0.501394	0.0135091	2.32153	0.0759019	0.8	0.12974	0.704159	0	0	0.0320387	0.194065	0.108672
Osono and Takeda (2004, 2005)	Kyoto (upper site)	Cryptomeria japonica	2	14	2	94.7757	0.342083	0.0135091	1.19007	0.273334	0.373004	0.0584379	0.960893	0	0	0.0293088	0.0537944	0.0805736
Osono and Takeda (2004, 2005)	Kyoto (upper site)	Fagus crenata	2	1	3	51.178	0.436541	0.0135091	1.56687	0.356851	0.74091	0.0478969	0.961093	0	0	0.0313684	0.0679595	0.0357753
Osono and Takeda (2004, 2005)	Kyoto (upper site)	Quercus crispula	2	2	3	63.1097	0.390019	0.0135091	1.72365	0.978378	0.458136	0.0495457	0.968294	0	0	0.030708	0.0637734	0.0485211
Osono and Takeda (2004, 2005)	Kyoto (upper site)	Acer mono	2	3	3	61.8289	0.322804	0.0135091	1.57312	0.492521	0.438308	0.0718293	0.948849	0	0	0.0519857	0.100819	0.0511024
Osono and Takeda (2004, 2005)	Kyoto (upper site)	Acer rufinerve	2	4	3	86.3125	0.463534	0.0135091	2.11606	0.611327	0.8	0.0783157	0.965912	0	0	0.0474736	0.10827	0.0665121
Osono and Takeda (2004, 2005)	Kyoto (upper site)	Swida controversa	2	5	3	20.7953	0.299163	0.0135091	2.09994	7.60832	0.05	0.0846402	0.916198	1	0	0.0736061	0.078523	0.0995399
Osono and Takeda (2004, 2005)	Kyoto (upper site)	Betula grossa	2	6	3	40.3815	0.416194	0.0135091	1.77259	0.675138	0.588177	0.0391834	0.968666	0	0	0.034297	0.0425699	0.0402186
Osono and Takeda (2004, 2005)	Kyoto (upper site)	Mallotus japonicus	2	7	3	22.9719	0.252116	0.0135091	1.57147	8.49253	0.05	0.100859	0.845564	1	0	0.101282	0.080836	0.117154
Osono and Takeda (2004, 2005)	Kyoto (upper site)	Pterostyrax hispida	2	8	3	13.71	0.414909	0.0135091	1.56687	2.13617	0.05	0.0565264	0.935536	1	0	0.0671816	0.0427215	0.0569842
Osono and Takeda (2004, 2005)	Kyoto (upper site)	Castanea crenata	2	9	3	47.5468	0.322646	0.0135091	1.89839	1.45028	0.3658	0.0656977	0.935785	0	0	0.0589841	0.0512055	0.0827493
Osono and Takeda (2004, 2005)	Kyoto (upper site)	Carpinus laxiflora	2	10	3	26.4674	0.314844	0.0135091	1.5513	1.63265	0.252163	0.0660146	0.913438	1	0	0.0607278	0.0726938	0.0640432
Osono and Takeda (2004, 2005)	Kyoto (upper site)	Magnolia obovata	2	11	3	56.5629	0.289926	0.0135091	5.83542	0.827614	0.643087	0.0904285	0.930233	0	1	0.0694113	0.134375	0.0407105
Osono and Takeda (2004, 2005)	Kyoto (upper site)	Pterocarya rhoifolia	2	12	3	29.8006	0.461924	0.0135091	2.33918	0.306924	0.8	0.0414262	0.948373	0	0	0.0399391	0.0335659	0.0492604
Osono and Takeda (2004, 2005)	Kyoto (upper site)	Aesculus turbinata	2	13	3	46.3902	0.501394	0.0135091	2.32883	0.076578	0.8	0.129644	0.704598	0	0	0.0320772	0.193976	0.108475
Osono and Takeda (2004, 2005)	Kyoto (upper site)	Cryptomeria japonica	2	14	3	94.7757	0.342083	0.0135091	1.1943	0.274179	0.372809	0.0584702	0.96085	0	0	0.0293311	0.0537873	0.0806405
Osono and Takeda (2004, 2005)	Kyoto (upper site)	Fagus crenata	2	1	4	51.178	0.436541	0.0135091	1.56121	0.355725	0.741275	0.0478443	0.961178	0	0	0.0313143	0.0678852	0.0357525
Osono and Takeda (2004, 2005)	Kyoto (upper site)	Quercus crispula	2	2	4	63.1097	0.390019	0.0135091	1.71845	0.976514	0.458352	0.0495489	0.96829	0	0	0.0308324	0.0636432	0.0486228
Osono and Takeda (2004, 2005)	Kyoto (upper site)	Acer mono	2	3	4	61.8289	0.322804	0.0135091	1.56817	0.491145	0.43854	0.0718647	0.948798	0	0	0.05216	0.100805	0.0511002
Osono and Takeda (2004, 2005)	Kyoto (upper site)	Acer rufinerve	2	4	4	86.3125	0.463534	0.0135091	2.10786	0.610264	0.8	0.0784086	0.965831	0	0	0.0476081	0.108355	0.0666062
Osono and Takeda (2004, 2005)	Kyoto (upper site)	Swida controversa	2	5	4	20.7953	0.299163	0.0135091	2.09591	7.6076	0.05	0.0847117	0.916057	1	0	0.0737316	0.0785272	0.099626
Osono and Takeda (2004, 2005)	Kyoto (upper site)	Betula grossa	2	6	4	40.3815	0.416194	0.0135091	1.76679	0.673583	0.58845	0.0392315	0.968589	0	0	0.0343611	0.0425729	0.0403014
Osono and Takeda (2004, 2005)	Kyoto (upper site)	Mallotus japonicus	2	7	4	22.9719	0.252116	0.0135091	1.56846	8.48745	0.05	0.100901	0.845434	1	0	0.101356	0.0808263	0.117206
Osono and Takeda (2004, 2005)	Kyoto (upper site)	Pterostyrax hispida	2	8	4	13.71	0.414909	0.0135091	1.5634	2.13292	0.05	0.0565472	0.935489	1	0	0.0672222	0.0427087	0.057008
Osono and Takeda (2004, 2005)	Kyoto (upper site)	Castanea crenata	2	9	4	47.5468	0.322646	0.0135091	1.89236	1.44877	0.366023	0.0658135	0.935558	0	0	0.0591621	0.051205	0.0828985
Osono and Takeda (2004, 2005)	Kyoto (upper site)	Carpinus laxiflora	2	10	4	26.4674	0.314844	0.0135091	1.54819	1.62951	0.252387	0.0659861	0.913512	1	0	0.0607402	0.0725878	0.0640638
Osono and Takeda (2004, 2005)	Kyoto (upper site)	Magnolia obovata	2	11	4	56.5629	0.289926	0.0135091	2.85269	0.667092	0.388285	0.0934045	0.925566	0	1	0.0763659	0.136881	0.0400639
Osono and Takeda (2004, 2005)	Kyoto (upper site)	Pterocarya rhoifolia	2	12	4	29.8006	0.461924	0.0135091	2.33186	0.305625	0.8	0.0415163	0.948148	0	0	0.0400358	0.0336234	0.0493702
Osono and Takeda (2004, 2005)	Kyoto (upper site)	Aesculus turbinata	2	13	4	46.3902	0.501394	0.0135091	2.32151	0.0759001	0.8	0.12974	0.704158	0	0	0.0320386	0.194066	0.108673
Osono and Takeda (2004, 2005)	Kyoto (upper site)	Cryptomeria japonica	2	14	4	94.7757	0.342083	0.0135091	1.19006	0.273332	0.373005	0.0584378	0.960893	0	0	0.0293088	0.0537944	0.0805734
Osono and Takeda (2004, 2005)	Kyoto (lower site)	Fagus crenata	2	1	1	51.1751	0.436541	0.016573	1.60664	0.266719	0.754849	0.0514571	0.95348	0	0	0.0413377	0.0520862	0.0593441
Osono and Takeda (2004, 2005)	Kyoto (lower site)	Quercus crispula	2	2	1	63.1124	0.390019	0.016573	1.79784	0.85113	0.523692	0.063886	0.956183	0	0	0.0447044	0.0871411	0.0514995
Osono and Takeda (2004, 2005)	Kyoto (lower site)	Acer mono	2	3	1	61.8332	0.322804	0.016573	1.72711	0.508744	0.453171	0.0706688	0.95314	0	0	0.052629	0.099829	0.0473984
Osono and Takeda (2004, 2005)	Kyoto (lower site)	Acer rufinerve	2	4	1	86.3151	0.463534	0.016573	2.1963	0.599295	0.8	0.102903	0.94483	0	0	0.054168	0.16476	0.0410692
Osono and Takeda (2004, 2005)	Kyoto (lower site)	Swida controversa	2	5	1	30.7846	0.398901	0.016573	1.85224	0.949366	0.05	0.0736403	0.834371	1	0	0.0639657	0.060942	0.0919954
Osono and Takeda (2004, 2005)	Kyoto (lower site)	Betula grossa	2	6	1	40.3778	0.416194	0.016573	1.88379	0.628502	0.633973	0.0628926	0.932158	0	0	0.0531034	0.084739	0.0431947
Osono and Takeda (2004, 2005)	Kyoto (lower site)	Mallotus japonicus	2	7	1	24.5453	0.23915	0.016573	2.96377	10.95	0.15057	0.125368	0.744314	1	0	0.097383	0.113195	0.157655
Osono and Takeda (2004, 2005)	Kyoto (lower site)	Pterostyrax hispida	2	8	1	13.948	0.412245	0.016573	1.30169	2.83798	0.05	0.083561	0.86013	1	0	0.0938823	0.0607942	0.0918558
Osono and Takeda (2004, 2005)	Kyoto (lower site)	Castanea crenata	2	9	1	47.5444	0.322646	0.016573	1.90403	1.38329	0.370929	0.0672569	0.938621	0	0	0.0576539	0.0765534	0.0662276
Osono and Takeda (2004, 2005)	Kyoto (lower site)	Carpinus laxiflora	2	10	1	27.6488	0.279398	0.016573	1.18742	2.09678	0.21742	0.0611567	0.926733	1	0	0.0419935	0.0853165	0.0466699
Osono and Takeda (2004, 2005)	Kyoto (lower site)	Magnolia obovata	2	11	1	56.5662	0.289926	0.016573	2.9349	0.739561	0.538151	0.132837	0.897303	0	1	0.0875296	0.205931	0.0535583
Osono and Takeda (2004, 2005)	Kyoto (lower site)	Pterocarya rhoifolia	2	12	1	29.7993	0.461924	0.016573	2.1935	0.341684	0.8	0.0663158	0.882044	0	0	0.0472546	0.0943778	0.0453121
Osono and Takeda (2004, 2005)	Kyoto (lower site)	Aesculus turbinata	2	13	1	46.3907	0.501394	0.016573	1.8362	0.073	0.8	0.129029	0.681942	0	0	0.0274698	0.204981	0.0846964
Osono and Takeda (2004, 2005)	Kyoto (lower site)	Cryptomeria japonica	2	14	1	94.7724	0.342083	0.016573	0.944206	0.326354	0.403277	0.0711816	0.946427	0	0	0.0327831	0.0933002	0.0736261
Osono and Takeda (2004, 2005)	Kyoto (lower site)	Fagus crenata	2	1	2	51.1751	0.436541	0.016573	1.60666	0.266721	0.754848	0.0514573	0.953479	0	0	0.0413378	0.0520866	0.0593442
Osono and Takeda (2004, 2005)	Kyoto (lower site)	Quercus crispula	2	2	2	63.1124	0.390019	0.016573	1.79785	0.851132	0.523692	0.063886	0.956183	0	0	0.0447045	0.087141	0.0514995
Osono and Takeda (2004, 2005)	Kyoto (lower site)	Acer mono	2	3	2	61.8332	0.322804	0.016573	1.72712	0.508746	0.453171	0.0706689	0.95314	0	0	0.0526288	0.0998292	0.0473985
Osono and Takeda (2004, 2005)	Kyoto (lower site)	Acer rufinerve	2	4	2	86.3151	0.463534	0.016573	2.19632	0.599297	0.8	0.102902	0.94483	0	0	0.054168	0.16476	0.0410692
Osono and Takeda (2004, 2005)	Kyoto (lower site)	Swida controversa	2	5	2	30.7846	0.398901	0.016573	1.85219	0.949387	0.05	0.0736403	0.834371	1	0	0.0639664	0.060942	0.0919949
Osono and Takeda (2004, 2005)	Kyoto (lower site)	Betula grossa	2	6	2	40.3778	0.416194	0.016573	1.88377	0.628515	0.633975	0.0628927	0.932158	0	0	0.0531028	0.0847398	0.043194
Osono and Takeda (2004, 2005)	Kyoto (lower site)	Mallotus japonicus	2	7	2	24.5453	0.23915	0.016573	2.9637	10.95	0.150569	0.125368	0.744314	1	0	0.0973838	0.113196	0.157653
Osono and Takeda (2004, 2005)	Kyoto (lower site)	Pterostyrax hispida	2	8	2	13.948	0.412245	0.016573	1.30169	2.83798	0.05	0.083561	0.86013	1	0	0.0938823	0.0607942	0.0918558
Osono and Takeda (2004, 2005)	Kyoto (lower site)	Castanea crenata	2	9	2	47.5444	0.322646	0.016573	1.90403	1.38329	0.370929	0.0672569	0.938621	0	0	0.0576539	0.0765534	0.0662277
Osono and Takeda (2004, 2005)	Kyoto (lower site)	Carpinus laxiflora	2	10	2	27.6488	0.279398	0.016573	1.18741	2.09678	0.217419	0.0611567	0.926733	1	0	0.0419933	0.0853166	0.0466699
Osono and Takeda (2004, 2005)	Kyoto (lower site)	Magnolia obovata	2	11	2	56.5662	0.289926	0.016573	5.39809	0.686	0.471323	0.11998	0.916221	0	1	0.103265	0.174025	0.0473023
Osono and Takeda (2004, 2005)	Kyoto (lower site)	Pterocarya rhoifolia	2	12	2	29.7993	0.461924	0.016573	2.19352	0.341686	0.8	0.0663158	0.882044	0	0	0.0472546	0.0943779	0.045312
Osono and Takeda (2004, 2005)	Kyoto (lower site)	Aesculus turbinata	2	13	2	46.3907	0.501394	0.016573	1.83624	0.073	0.8	0.129028	0.681944	0	0	0.0274699	0.20498	0.0846971
Osono and Takeda (2004, 2005)	Kyoto (lower site)	Cryptomeria japonica	2	14	2	94.7724	0.342083	0.016573	0.944209	0.326357	0.403276	0.0711816	0.946427	0	0	0.0327832	0.0933001	0.0736263
Osono and Takeda (2004, 2005)	Kyoto (lower site)	Fagus crenata	2	1	3	51.1751	0.436541	0.016573	1.61248	0.267621	0.754451	0.0515383	0.953333	0	0	0.0413709	0.0522165	0.0594177
Osono and Takeda (2004, 2005)	Kyoto (lower site)	Quercus crispula	2	2	3	63.1124	0.390019	0.016573	1.80349	0.852892	0.523452	0.0638998	0.956164	0	0	0.0446733	0.087212	0.0514578
Osono and Takeda (2004, 2005)	Kyoto (lower site)	Acer mono	2	3	3	61.8332	0.322804	0.016573	1.73202	0.51021	0.452929	0.070698	0.953101	0	0	0.0525425	0.0999326	0.0474065
Osono and Takeda (2004, 2005)	Kyoto (lower site)	Acer rufinerve	2	4	3	86.3151	0.463534	0.016573	2.20485	0.600364	0.8	0.10279	0.94495	0	0	0.0540832	0.164584	0.0410437
Osono and Takeda (2004, 2005)	Kyoto (lower site)	Swida controversa	2	5	3	30.7846	0.398901	0.016573	1.85626	0.951497	0.05	0.0736196	0.834464	1	0	0.0639289	0.0609399	0.0919725
Osono and Takeda (2004, 2005)	Kyoto (lower site)	Betula grossa	2	6	3	40.3778	0.416194	0.016573	1.88912	0.630085	0.633639	0.0630015	0.931923	0	0	0.0531427	0.084925	0.0432571
Osono and Takeda (2004, 2005)	Kyoto (lower site)	Mallotus japonicus	2	7	3	24.5453	0.23915	0.016573	10.95	6.41832	0.260871	0.132637	0.713805	1	1	0.0940102	0.145907	0.150503
Osono and Takeda (2004, 2005)	Kyoto (lower site)	Pterostyrax hispida	2	8	3	13.948	0.412245	0.016573	1.30475	2.8419	0.05	0.0835451	0.860183	1	0	0.0938406	0.0608013	0.0918506
Osono and Takeda (2004, 2005)	Kyoto (lower site)	Castanea crenata	2	9	3	47.5444	0.322646	0.016573	1.90873	1.38555	0.370641	0.0672874	0.938565	0	0	0.0575743	0.0767729	0.0661355
Osono and Takeda (2004, 2005)	Kyoto (lower site)	Carpinus laxiflora	2	10	3	27.6488	0.279398	0.016573	1.18985	2.10084	0.217235	0.0611888	0.926656	1	0	0.0419586	0.0853987	0.0466772
Osono and Takeda (2004, 2005)	Kyoto (lower site)	Magnolia obovata	2	11	3	56.5662	0.289926	0.016573	4.13054	0.857599	0.605383	0.1278	0.904944	0	1	0.0693574	0.202153	0.0576401
Osono and Takeda (2004, 2005)	Kyoto (lower site)	Pterocarya rhoifolia	2	12	3	29.7993	0.461924	0.016573	2.20099	0.342952	0.8	0.0663307	0.881991	0	0	0.047235	0.0944362	0.0452765
Osono and Takeda (2004, 2005)	Kyoto (lower site)	Aesculus turbinata	2	13	3	46.3907	0.501394	0.016573	1.84939	0.073	0.8	0.1289	0.682577	0	0	0.0274895	0.204625	0.0849614
Osono and Takeda (2004, 2005)	Kyoto (lower site)	Cryptomeria japonica	2	14	3	94.7724	0.342083	0.016573	0.947776	0.327352	0.40307	0.0712055	0.946391	0	0	0.0327366	0.0933247	0.073685
Osono and Takeda (2004, 2005)	Kyoto (lower site)	Fagus crenata	2	1	4	51.1751	0.436541	0.016573	1.60664	0.266719	0.754849	0.0514571	0.95348	0	0	0.0413377	0.0520862	0.059344
Osono and Takeda (2004, 2005)	Kyoto (lower site)	Quercus crispula	2	2	4	63.1124	0.390019	0.016573	1.79783	0.851128	0.523693	0.0638859	0.956183	0	0	0.0447046	0.0871408	0.0514996
Osono and Takeda (2004, 2005)	Kyoto (lower site)	Acer mono	2	3	4	61.8332	0.322804	0.016573	1.72711	0.508743	0.453172	0.0706688	0.95314	0	0	0.052629	0.0998289	0.0473984
Osono and Takeda (2004, 2005)	Kyoto (lower site)	Acer rufinerve	2	4	4	86.3151	0.463534	0.016573	2.19629	0.599294	0.8	0.102903	0.944829	0	0	0.0541682	0.164761	0.0410692
Osono and Takeda (2004, 2005)	Kyoto (lower site)	Swida controversa	2	5	4	30.7846	0.398901	0.016573	1.85218	0.94938	0.05	0.0736404	0.83437	1	0	0.0639665	0.060942	0.091995
Osono and Takeda (2004, 2005)	Kyoto (lower site)	Betula grossa	2	6	4	40.3778	0.416194	0.016573	1.88376	0.62851	0.633976	0.0628924	0.932158	0	0	0.0531027	0.0847393	0.0431938
Osono and Takeda (2004, 2005)	Kyoto (lower site)	Mallotus japonicus	2	7	4	24.5453	0.23915	0.016573	2.96376	10.95	0.150571	0.125368	0.744314	1	0	0.0973831	0.113196	0.157655
Osono and Takeda (2004, 2005)	Kyoto (lower site)	Pterostyrax hispida	2	8	4	13.948	0.412245	0.016573	1.30168	2.83797	0.05	0.083561	0.860129	1	0	0.0938824	0.0607942	0.0918558
Osono and Takeda (2004, 2005)	Kyoto (lower site)	Castanea crenata	2	9	4	47.5444	0.322646	0.016573	1.90401	1.38329	0.370929	0.0672569	0.938621	0	0	0.0576541	0.0765528	0.0662279
Osono and Takeda (2004, 2005)	Kyoto (lower site)	Carpinus laxiflora	2	10	4	27.6488	0.279398	0.016573	1.18741	2.09677	0.21742	0.0611567	0.926733	1	0	0.0419933	0.0853164	0.0466699
Osono and Takeda (2004, 2005)	Kyoto (lower site)	Magnolia obovata	2	11	4	56.5662	0.289926	0.016573	5.17269	0.67349	0.473816	0.122746	0.912313	0	1	0.105129	0.177245	0.0522691
Osono and Takeda (2004, 2005)	Kyoto (lower site)	Pterocarya rhoifolia	2	12	4	29.7993	0.461924	0.016573	2.1935	0.341683	0.8	0.0663158	0.882044	0	0	0.0472546	0.0943777	0.0453121
Osono and Takeda (2004, 2005)	Kyoto (lower site)	Aesculus turbinata	2	13	4	46.3907	0.501394	0.016573	1.8362	0.073	0.8	0.129029	0.681941	0	0	0.0274698	0.204981	0.0846964
Osono and Takeda (2004, 2005)	Kyoto (lower site)	Cryptomeria japonica	2	14	4	94.7724	0.342083	0.016573	0.944199	0.326354	0.403277	0.0711816	0.946427	0	0	0.0327834	0.0933001	0.0736261
Osono (2017)	Okinawa	Castanopsis sieboldii	3	1	1	47.4824	0.2866	0.00180704	3.17867	1.3642	0.110727	0.0459772	0.969946	0	0	0.030546	0.0560144	0.0476553
Osono (2017)	Okinawa	Schima wallichii	3	2	1	60.8128	0.356935	0.00180704	3.39182	1.09592	0.32785	0.038885	0.982055	0	1	0.0247538	0.0421846	0.0463015
Osono (2017)	Okinawa	Daphniphyllum teijismannii	3	3	1	53.6935	0.287418	0.00180704	3.40521	1.50935	0.29148	0.0521996	0.967951	1	0	0.0354147	0.0732137	0.0394961
Osono (2017)	Okinawa	Persea thunbergii	3	4	1	66.2117	0.379332	0.00180704	2.47619	1.34311	0.229888	0.0310526	0.986866	0	0	0.0242692	0.0413004	0.0244556
Osono (2017)	Okinawa	Distylium racemosum	3	5	1	62.7616	0.329896	0.00180704	3.25841	0.600808	0.143736	0.0564624	0.947284	0	0	0.022961	0.0687617	0.0656403
Osono (2017)	Okinawa	Camellia japonica	3	6	1	61.2481	0.297599	0.00180704	1.51585	0.292087	0.464993	0.0773535	0.890682	0	1	0.0438141	0.0832301	0.0954137
Osono (2017)	Okinawa	Pinus luchuensis	3	7	1	109.598	0.429369	0.00180704	2.45998	1.10231	0.457335	0.0677422	0.954311	0	1	0.0341675	0.105259	0.0389885
Osono (2017)	Okinawa	Dendropanax trifidus	3	8	1	51.0746	0.239793	0.00180704	2.07437	5.55224	0.135022	0.0892265	0.851951	1	0	0.0872247	0.0756529	0.102726
Osono (2017)	Okinawa	Elaeocarpus japonicus	3	9	1	64.5589	0.327511	0.00180704	4.17798	0.870554	0.198248	0.0561936	0.949151	0	1	0.0339369	0.0444421	0.0796639
Osono (2017)	Okinawa	Alnus formosana	3	10	1	20.1744	0.458379	0.00180704	8.01738	0.462023	0.05	0.0562594	0.870058	0	0	0.0501824	0.0563554	0.0616536
Osono (2017)	Okinawa	Mallotus japonicus	3	11	1	32.8414	0.206024	0.00180704	10.95	1.74221	0.05	0.0936508	0.84877	1	0	0.0834574	0.0935511	0.102929
Osono (2017)	Okinawa	Miscanthus condensatus	3	12	1	86.6819	0.270744	0.00180704	2.06113	3.23742	0.19172	0.0653488	0.956985	0	1	0.035399	0.0884366	0.0611332
Osono (2017)	Okinawa	Castanopsis sieboldii	3	1	2	47.4824	0.2866	0.00180704	3.17867	1.36419	0.110727	0.0459772	0.969946	0	0	0.030546	0.0560144	0.0476554
Osono (2017)	Okinawa	Schima wallichii	3	2	2	60.8128	0.356935	0.00180704	3.84086	1.10265	0.274607	0.0402329	0.980789	0	1	0.0338514	0.0401533	0.0458023
Osono (2017)	Okinawa	Daphniphyllum teijismannii	3	3	2	53.6935	0.287418	0.00180704	3.40527	1.50933	0.291478	0.0521996	0.96795	1	0	0.035415	0.0732136	0.0394964
Osono (2017)	Okinawa	Persea thunbergii	3	4	2	66.2117	0.379332	0.00180704	2.47617	1.34312	0.229888	0.0310526	0.986866	0	0	0.0242695	0.0413002	0.0244556
Osono (2017)	Okinawa	Distylium racemosum	3	5	2	62.7616	0.329896	0.00180704	3.25836	0.600817	0.143736	0.0564624	0.947284	0	0	0.0229614	0.0687618	0.06564
Osono (2017)	Okinawa	Camellia japonica	3	6	2	61.2481	0.297599	0.00180704	10.95	0.301624	0.368453	0.0692773	0.912318	0	1	0.0564894	0.0648579	0.0836686
Osono (2017)	Okinawa	Pinus luchuensis	3	7	2	109.598	0.429369	0.00180704	6.55316	0.974816	0.460767	0.0632136	0.960215	0	1	0.0450709	0.0911978	0.0404902
Osono (2017)	Okinawa	Dendropanax trifidus	3	8	2	51.0746	0.239793	0.00180704	2.07437	5.55225	0.135022	0.0892265	0.851951	1	0	0.0872247	0.0756528	0.102726
Osono (2017)	Okinawa	Elaeocarpus japonicus	3	9	2	64.5589	0.327511	0.00180704	4.36583	0.860264	0.178007	0.056742	0.948153	0	1	0.0366342	0.0454763	0.0790494
Osono (2017)	Okinawa	Alnus formosana	3	10	2	20.1744	0.458379	0.00180704	8.0173	0.462024	0.05	0.0562594	0.870058	0	0	0.0501823	0.0563555	0.0616536
Osono (2017)	Okinawa	Mallotus japonicus	3	11	2	32.8414	0.206024	0.00180704	2.74498	5.63535	0.116274	0.0926201	0.852081	1	0	0.0954286	0.0834573	0.0983042
Osono (2017)	Okinawa	Miscanthus condensatus	3	12	2	86.6819	0.270744	0.00180704	1.9803	3.4875	0.180024	0.0660075	0.956114	0	1	0.0387416	0.0885591	0.0610519
Osono (2017)	Okinawa	Castanopsis sieboldii	3	1	3	47.4824	0.2866	0.00180704	3.1797	1.36972	0.110649	0.0458011	0.970176	0	0	0.0304853	0.0558016	0.0474348
Osono (2017)	Okinawa	Schima wallichii	3	2	3	60.8128	0.356935	0.00180704	3.46707	1.11045	0.324684	0.0394557	0.981524	0	1	0.0242321	0.0427719	0.0474724
Osono (2017)	Okinawa	Daphniphyllum teijismannii	3	3	3	53.6935	0.287418	0.00180704	3.41129	1.51151	0.291129	0.0522957	0.967832	1	0	0.0354786	0.0733579	0.0395526
Osono (2017)	Okinawa	Persea thunbergii	3	4	3	66.2117	0.379332	0.00180704	2.48304	1.34487	0.229768	0.030965	0.98694	0	0	0.0241537	0.0411847	0.024432
Osono (2017)	Okinawa	Distylium racemosum	3	5	3	62.7616	0.329896	0.00180704	3.25955	0.603567	0.143723	0.0564297	0.947345	0	0	0.0229884	0.0686492	0.065664
Osono (2017)	Okinawa	Camellia japonica	3	6	3	61.2481	0.297599	0.00180704	3.60026	0.396984	0.705983	0.0732809	0.901891	0	1	0.0363283	0.0805116	0.0911503
Osono (2017)	Okinawa	Pinus luchuensis	3	7	3	109.598	0.429369	0.00180704	2.70055	1.06892	0.479132	0.0674996	0.954638	0	1	0.0353886	0.104614	0.0383683
Osono (2017)	Okinawa	Dendropanax trifidus	3	8	3	51.0746	0.239793	0.00180704	2.07778	5.55426	0.134906	0.0891785	0.85211	1	0	0.0871682	0.0756333	0.102663
Osono (2017)	Okinawa	Elaeocarpus japonicus	3	9	3	64.5589	0.327511	0.00180704	4.14493	0.873741	0.196255	0.0563534	0.948861	0	1	0.0336698	0.0441298	0.0802871
Osono (2017)	Okinawa	Alnus formosana	3	10	3	20.1744	0.458379	0.00180704	8.00424	0.463871	0.05	0.0562095	0.870289	0	0	0.050138	0.0563277	0.0615783
Osono (2017)	Okinawa	Mallotus japonicus	3	11	3	32.8414	0.206024	0.00180704	10.95	1.74548	0.05	0.0936059	0.848915	1	0	0.0834495	0.0935015	0.102858
Osono (2017)	Okinawa	Miscanthus condensatus	3	12	3	86.6819	0.270744	0.00180704	2.16471	3.09198	0.198279	0.0649163	0.957553	0	1	0.0342239	0.0886075	0.0601648
Osono (2017)	Okinawa	Castanopsis sieboldii	3	1	4	47.4824	0.2866	0.00180704	3.17862	1.3642	0.110727	0.0459777	0.969945	0	0	0.0305465	0.0560151	0.0476556
Osono (2017)	Okinawa	Schima wallichii	3	2	4	60.8128	0.356935	0.00180704	3.75774	1.08667	0.278634	0.0396168	0.981373	0	1	0.0311238	0.0403579	0.045946
Osono (2017)	Okinawa	Daphniphyllum teijismannii	3	3	4	53.6935	0.287418	0.00180704	3.40521	1.50935	0.291481	0.0521994	0.967951	1	0	0.0354147	0.0732134	0.039496
Osono (2017)	Okinawa	Persea thunbergii	3	4	4	66.2117	0.379332	0.00180704	2.47616	1.34311	0.229889	0.0310529	0.986866	0	0	0.0242697	0.0413006	0.0244557
Osono (2017)	Okinawa	Distylium racemosum	3	5	4	62.7616	0.329896	0.00180704	3.25835	0.60081	0.143736	0.0564625	0.947284	0	0	0.0229613	0.0687621	0.0656399
Osono (2017)	Okinawa	Camellia japonica	3	6	4	61.2481	0.297599	0.00180704	10.95	0.264987	0.394245	0.0766703	0.892605	0	1	0.0615839	0.0708769	0.0939088
Osono (2017)	Okinawa	Pinus luchuensis	3	7	4	109.598	0.429369	0.00180704	10.95	0.850919	0.518482	0.0651041	0.9578	0	1	0.0524262	0.0904525	0.0422549
Osono (2017)	Okinawa	Dendropanax trifidus	3	8	4	51.0746	0.239793	0.00180704	2.07438	5.55218	0.135022	0.0892266	0.85195	1	0	0.0872247	0.0756533	0.102726
Osono (2017)	Okinawa	Elaeocarpus japonicus	3	9	4	64.5589	0.327511	0.00180704	4.26683	0.863762	0.179979	0.0565557	0.948493	0	1	0.0354711	0.0447638	0.0795842
Osono (2017)	Okinawa	Alnus formosana	3	10	4	20.1744	0.458379	0.00180704	8.01739	0.462018	0.05	0.0562596	0.870058	0	0	0.0501825	0.0563555	0.0616538
Osono (2017)	Okinawa	Mallotus japonicus	3	11	4	32.8414	0.206024	0.00180704	2.74503	5.63518	0.116272	0.0926202	0.852081	1	0	0.0954283	0.0834585	0.0983037
Osono (2017)	Okinawa	Miscanthus condensatus	3	12	4	86.6819	0.270744	0.00180704	2.03392	3.31119	0.183234	0.0652811	0.957074	0	1	0.0363589	0.0882076	0.0606822
