# Supplementary material for: Modeling Microbial Adaptations to Nutrient Limitation During Litter Decomposition
Source: Frontiers journal article supplement (doi:10.3389/ffgc.2021.686945), 2021-06-11
Supplement: Data_Sheet_2.XLSX [file Data_Sheet_2.XLSX]

## Sheet: global optimization
Study	Study (progressive number)	Resouce use strategy (1 to 4 as in Fig. 1B-E)	Imax (gN/g initial C/y)	VH (1/y)	VO (1/y)	emax (-)	RMSE (-)	Fraction of explained variance (R2)
Berg and McClaugherty (1989)	1	1	0.00202904	0.835279	0.381128	0.162754	0.153786	0.642826
Berg and McClaugherty (1989)	1	2	0.00202904	0.862347	0.374214	0.164394	0.153606	0.64366
Berg and McClaugherty (1989)	1	3	0.00202904	0.883223	0.422713	0.16097	0.152447	0.649018
Berg and McClaugherty (1989)	1	4	0.00202904	0.921721	0.4815	0.159896	0.149339	0.663183
Hirobe et al. (2004)	4	1	0.00535487	4.52675	1.20878	0.113362	0.152278	0.631945
Hirobe et al. (2004)	4	2	0.00535487	4.52692	1.20875	0.113364	0.152278	0.631945
Hirobe et al. (2004)	4	3	0.00535487	4.56046	1.25589	0.113578	0.152331	0.631692
Hirobe et al. (2004)	4	4	0.00535487	4.67276	1.58128	0.122642	0.147113	0.656491
Osono and Takeda (2004, 2005)	2	1	0.015041	5.92564	0.298201	0.8	0.228823	0.514202
Osono and Takeda (2004, 2005)	2	2	0.015041	1.60865	0.440415	0.378711	0.25009	0.419706
Osono and Takeda (2004, 2005)	2	3	0.015041	4.96217	0.335157	0.533038	0.246722	0.435231
Osono and Takeda (2004, 2005)	2	4	0.015041	1.62647	0.631712	0.396115	0.242552	0.454159
Osono (2017)	3	1	0.00180703	2.23166	1.11999	0.301351	0.156518	0.699163
Osono (2017)	3	2	0.00180703	1.90091	1.155	0.232409	0.162111	0.67728
Osono (2017)	3	3	0.00180703	2.5781	1.13574	0.297037	0.155574	0.702781
Osono (2017)	3	4	0.00180703	2.22838	1.48011	0.236047	0.152534	0.714282
